# Supplementary material for: Synthesis of rotenone loaded zein nano-formulation for plant protection against pathogenic microbes
Source: Royal Society of Chemistry journal article supplement (doi:10.1039/c9ra08739g), 2019-01-01
Supplement: c9ra08739g1.pdf [file c9ra08739g1.pdf]

## SUPPLEMENTARY INFORMATION

### Synthesis of rotenone loaded zein nano-formulation for plant protection against pathogenic microbes

Ngangom Bidyarani<sup>1</sup>, Umesh Kumar<sup>1\*</sup>

<sup>1</sup>School of Nano Sciences, Central University of Gujarat, Gandhinagar-382030, Gujarat, India

\*Correspondence: umesh.kumar@cug.ac.in

Table S1 <sup>1</sup>HNMR analysis of zein powder, ZSC, pure rotenone (RN) and RNZSC nanoparticles

| <b>Zein powder</b>       | <b>ZSC</b>                       | <b>Pure rotenone (RN)</b>           | <b>RNZSC</b>   | <b>±δ (ppm)</b> |
|--------------------------|----------------------------------|-------------------------------------|----------------|-----------------|
|                          |                                  | 7.9-6.5 (H of Aromatic ring)        | 7.9-6.6 (RN)   | 0.1             |
|                          |                                  | 5.3-5.0 (H attached to alkene C=CH) | 5.3-4.9 (RN)   | 0.1             |
|                          |                                  | 4.6-2.9 (H of -O-CH-)               | 4.6-4.3 (RN)   | 0.1             |
|                          | 3.9 (-O-CH <sub>2</sub> - of SC) |                                     | 3.8 (ZSC)      | 0.1             |
| 2.2 (-CH of -NH)         | 2.2 (-CH of -NH of zein)         |                                     |                |                 |
|                          |                                  | 2.1 (CH <sub>3</sub> -CO)           | 2.2 (RN)       | 0.1             |
|                          | 1.9 (-CH of -NH of SC & zein)    | 1.9 (-CH <sub>2</sub> -)            | 1.8 (RN & ZSC) | 0.1             |
|                          | 1.8 (-CH of -NH of SC & zein)    | 1.7 (-CH <sub>2</sub> -)            | 1.6 (RN & ZSC) | 0.1             |
| 1.6 (-CH <sub>2</sub> -) | 1.6 (-CH <sub>2</sub> - of zein) |                                     |                |                 |
| 1.3 (-CH <sub>2</sub> -) | 1.4 (-CH <sub>2</sub> - zein)    |                                     | 1.3 (ZSC)      | 0.1             |

Table ST2 FTIR peaks with corresponding functional group of the prepared nanoparticles

| Wavenumber/peaks (cm <sup>-1</sup> )                         | Functional group                                                                |
|--------------------------------------------------------------|---------------------------------------------------------------------------------|
| 1644 cm <sup>-1</sup>                                        | Amide I of zein protein in ZSC                                                  |
| 1545 cm <sup>-1</sup>                                        | Amide II along with =CH <sub>2</sub> of zein protein in ZSC                     |
| 2928 cm <sup>-1</sup>                                        | C-H stretching of zein protein in ZSC                                           |
| 2938, 1674, 1605, 1515, 1456, 1357 and 1091 cm <sup>-1</sup> | cyclic alkene detected in pure rotenone (RN) structures                         |
| 2968 cm <sup>-1</sup>                                        | C-H bending of aromatic alkyl of rotenone                                       |
| 2968, 1663, 1535, 1458, 1359 and 1093 cm <sup>-1</sup>       | The characteristic peaks observed in RNZSC which was also present in ZSC and RN |

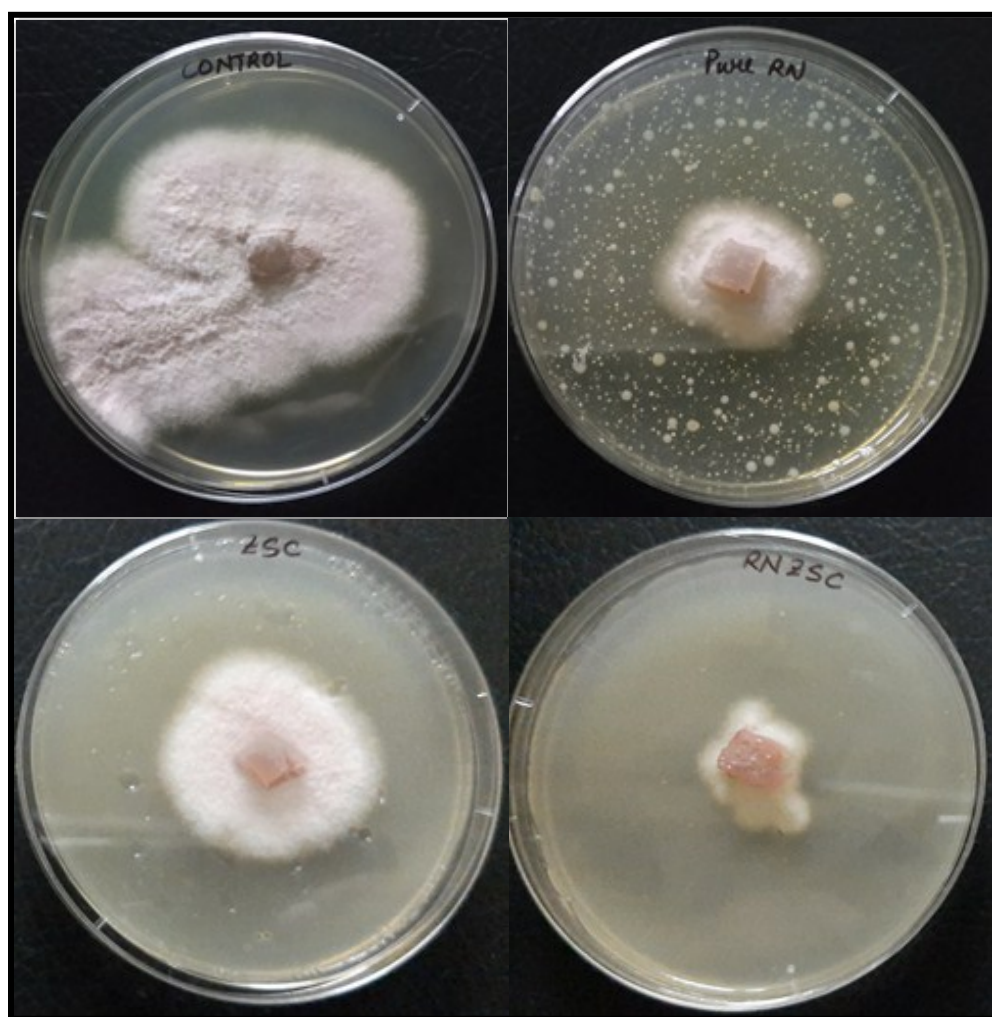

Fig. S1 Plate assay of antifungal activity of ZSC, RNZSC, RN against *F. oxysporum* and control (*F. oxysporum*).

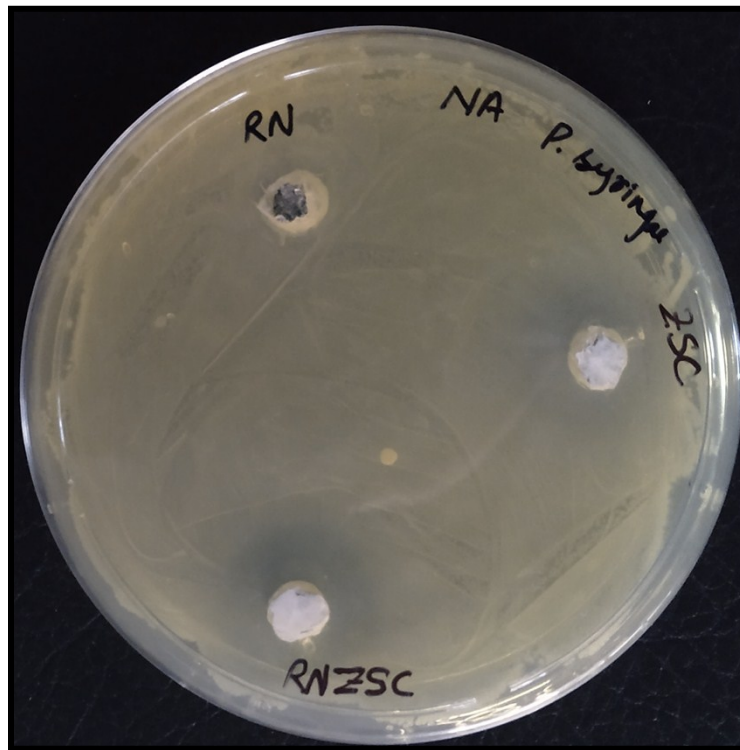

Fig. S2 Antibacterial activity by well diffusion method of ZSC, RNZSC and RN against *P. syringae*.

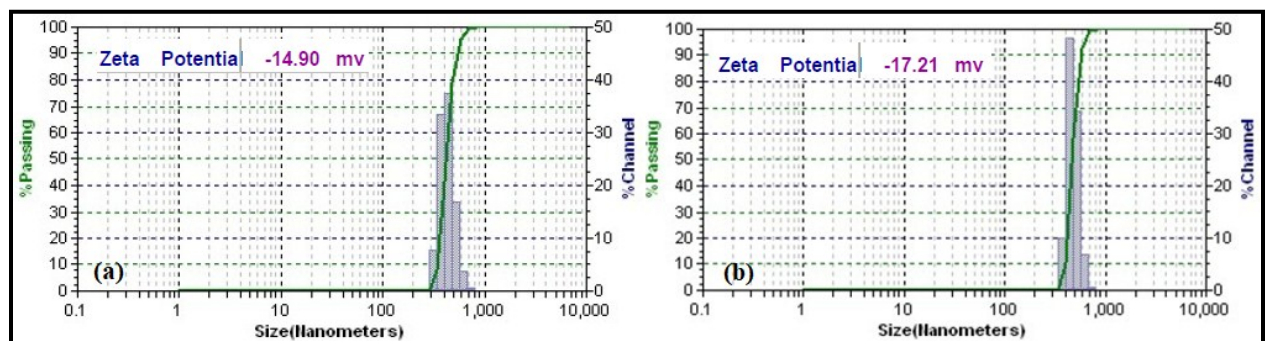

Fig. S3 DLS measurement of (a) ZSC and (b) RNZSC showing particle size and zeta potential.

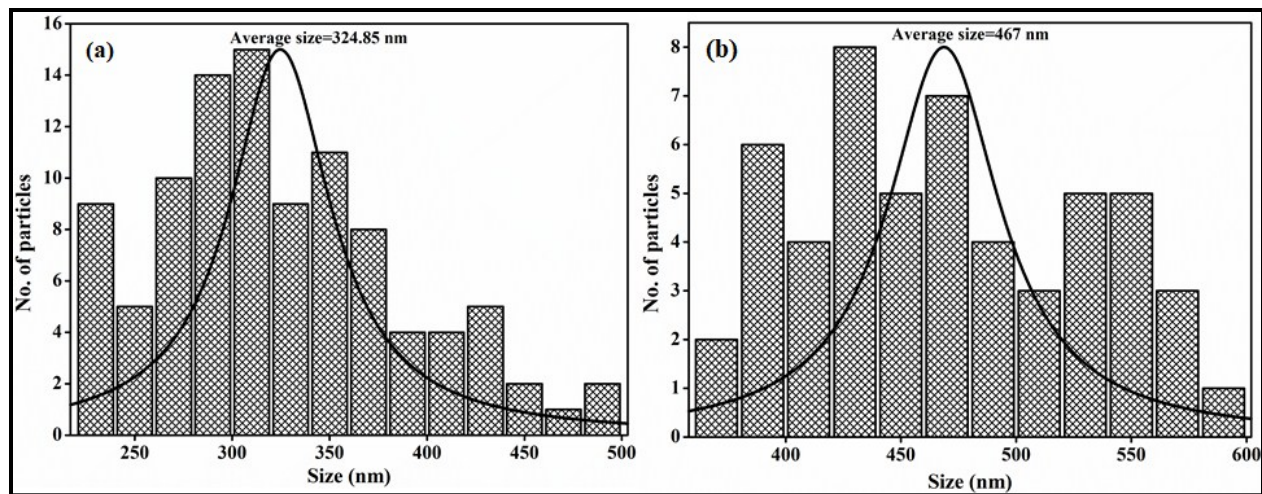

Fig. S4 Average size histogram of (a) ZSC and (b) RNZSC from FE-SEM
